# Supplementary material for: Metabolites Identification of Chemical Constituents From the Eggplant (Solanum melongena L.) Calyx in Rats by UPLC/ESI/qTOF-MS Analysis and Their Cytotoxic Activities
Source: PubMed Central journal article supplement (PMC8320773; doi:10.3389/fphar.2021.655008), 2021-07-15
Supplement: Presentation1.pdf [file Presentation1.pdf]

# **Metabolites identification of chemical constituents from the eggplant (*Solanum melongena* L.) calyx in rats by UPLC/ESI/qTOF-MS analysis and their cytotoxic activities**

Yuanyuan Song <sup>a,1</sup>, Ting Mei <sup>a,1</sup>, Yan Liu <sup>b,1</sup>, Shengnan Kong <sup>b</sup>, Jincheng Zhang <sup>a</sup>, Minzhen Xie <sup>a</sup>, Shan Ou <sup>a</sup>, Meixia Liang <sup>a</sup>, Qi Wang <sup>a,\*</sup>

## **Affiliation:**

<sup>a</sup> *Department of Medicinal Chemistry and Natural Medicine Chemistry, College of Pharmacy, Harbin Medical University, Harbin 150081, China*

<sup>b</sup> *Key Laboratory of Chinese Materia Medica, Heilongjiang University of Chinese Medicine, Harbin 150040, China*

## **\*Correspondence:**

Qi Wang, PhD, Department of Medicinal Chemistry and Natural Medicine Chemistry, Harbin Medical University, 157 Baojian Road, Nangang District, Harbin, Heilongjiang 150081, China. Tel: 86-451-86660227, E-mail address: mydearmumu@163.com.

<sup>1</sup>. These authors contributed equally to this work.

## Table of Contents

**Fig. S1.** Base peak chromatograms of **1** in rats liver after oral administration (A), extracted ion chromatograms of **1-M2** in rat liver microsomes (B), and the standard solution of **1-M2** (C) .

**Fig. S2.** Proposed metabolic pathway for **5** in rats after oral administration.

**Fig. S3.** TIC chromatograms of metabolites of *n*-trans-p-coumaroyltyramine (**1**, a), *n*-trans-p-coumaroyloctopamine (**2**, b), *n*-trans-p-coumaroylnoradrenline (**3**, c), *n*-trans-feruloyloctopamine (**4**, d), phenylpropanoid neochlorogenic acid (**5**, e) in rat liver microsomes in vitro.

**Fig. S4.** Total ion chromatograms (a) and extracted ion chromatograms (b, c, d, e, f, g, h) of compound **1** and its metabolites in rat urine.

**Fig. S5.** Total ion chromatograms (a) and extracted ion chromatograms (b, c, d, e, f, g, h) of compound **2** and its metabolites in rat urine.

**Fig. S6.** Total ion chromatograms (a) and extracted ion chromatograms (b, c, d, e, f, g, h, i, j) of compound **3** and its metabolites in rat urine.

**Fig. S7.** Total ion chromatograms (a) and extracted ion chromatograms (b, c, d, e, f, g, h) of compound **4** and its metabolites in rat urine.

**Fig. S8.** Total ion chromatograms (a) and extracted ion chromatograms (b, c, d, e, f, g, h) of compound **5** and its metabolites in rat urine.

**Table S1.** The effects of **1-5** on cell activity of A549 (human lung adenocarcinoma

cell).

**Table S2.** The effects of **1-5** on cell activity of HepG2 (human liver cancer cell).

**Table S3.** The effects of **1-5** on cell activity of HCT116 (Human colorectal cancer cells).

**Table S4.** The effects of **1-5** on cell activity of MCF7 (Human breast cancer cells).

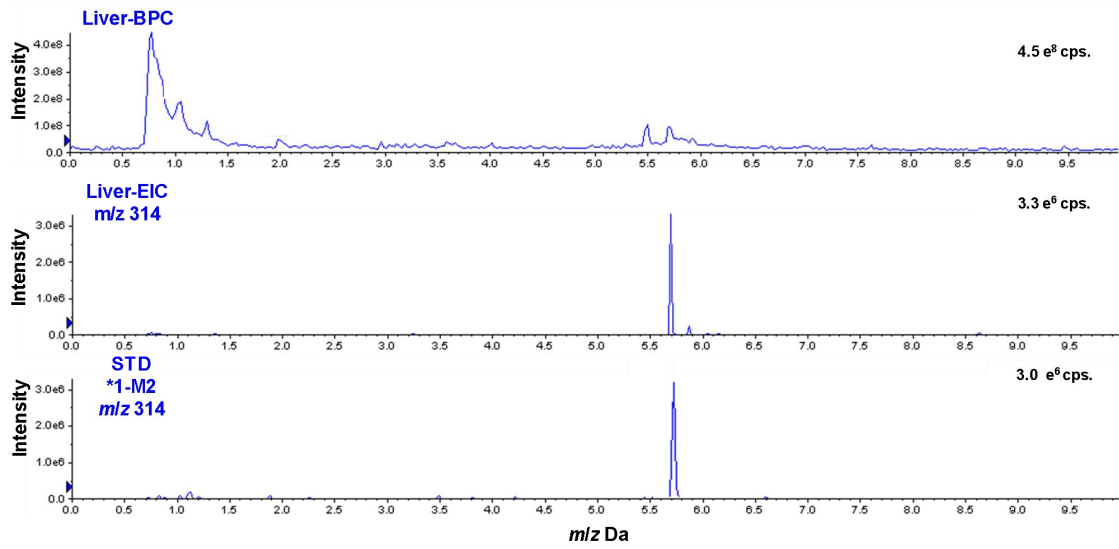

**Figure S1.** Base peak chromatograms of **1** in rats liver after oral administration (A), extracted ion chromatograms of **1-M2** in rat liver (B), and the standard solution of **1-M2** (C) .

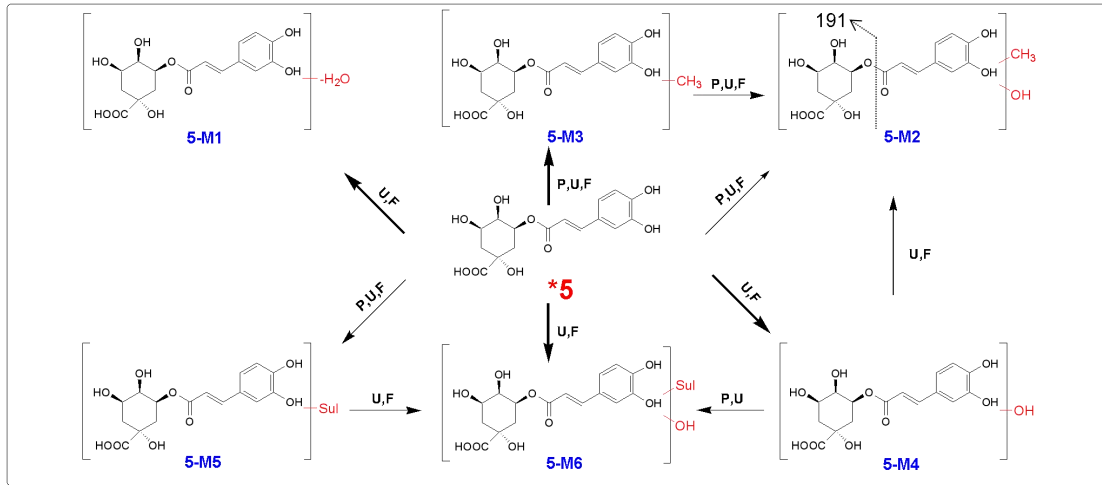

**Figure S2.** Proposed metabolic pathway for **5** in rats after oral administration.

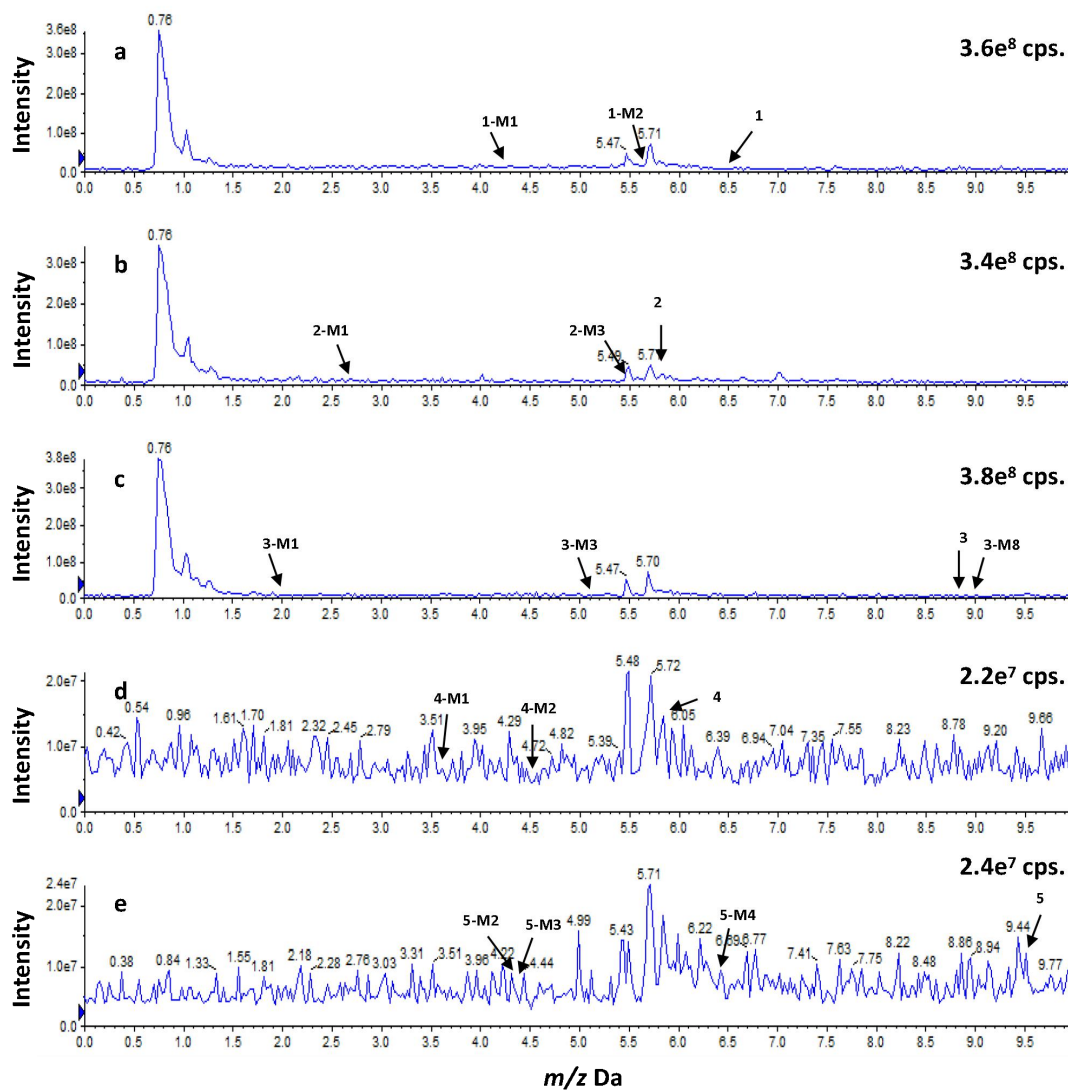

**Fig. S3.** TIC chromatograms of metabolites of *n*-trans-p-coumaroyltyramine (**1**, a), *n*-trans-p-coumaroyloctopamine (**2**, b), *n*-trans-p-coumaroylnoradrenline (**3**, c), *n*-trans-feruloyloctopamine (**4**, d), phenylpropanoid neochlorogenic acid (**5**, e) in rat liver microsomes in vitro.

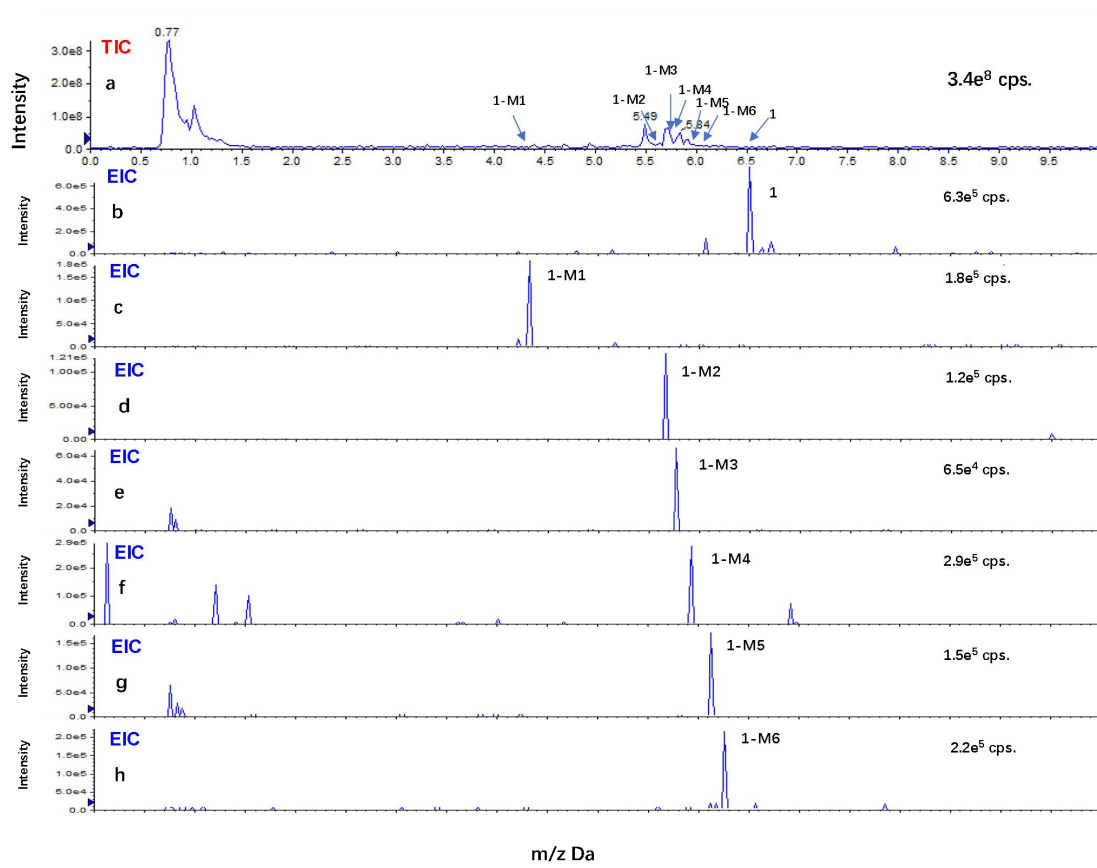

**Fig. S4.** Total ion chromatograms (a) and extracted ion chromatograms (b, c, d, e, f, g, h) of compound **1** and its metabolites in rat urine.

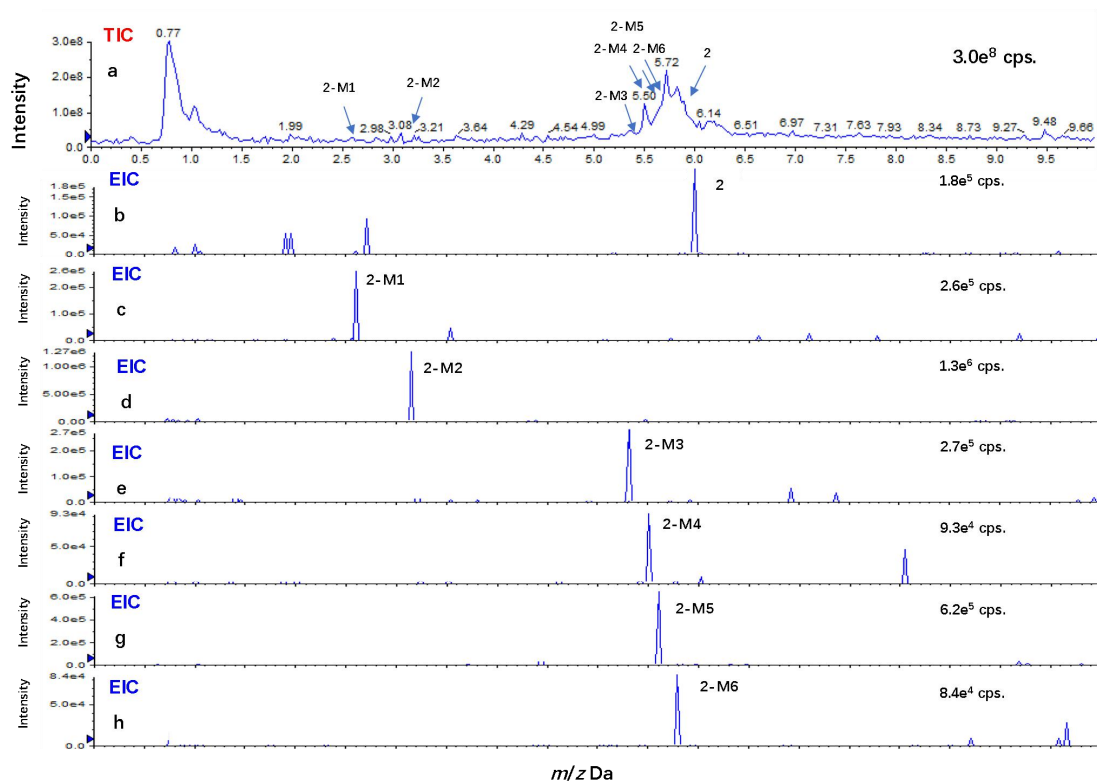

**Fig. S5.** Total ion chromatograms (a) and extracted ion chromatograms (b, c, d, e, f, g, h) of compound **2** and its metabolites in rat urine.



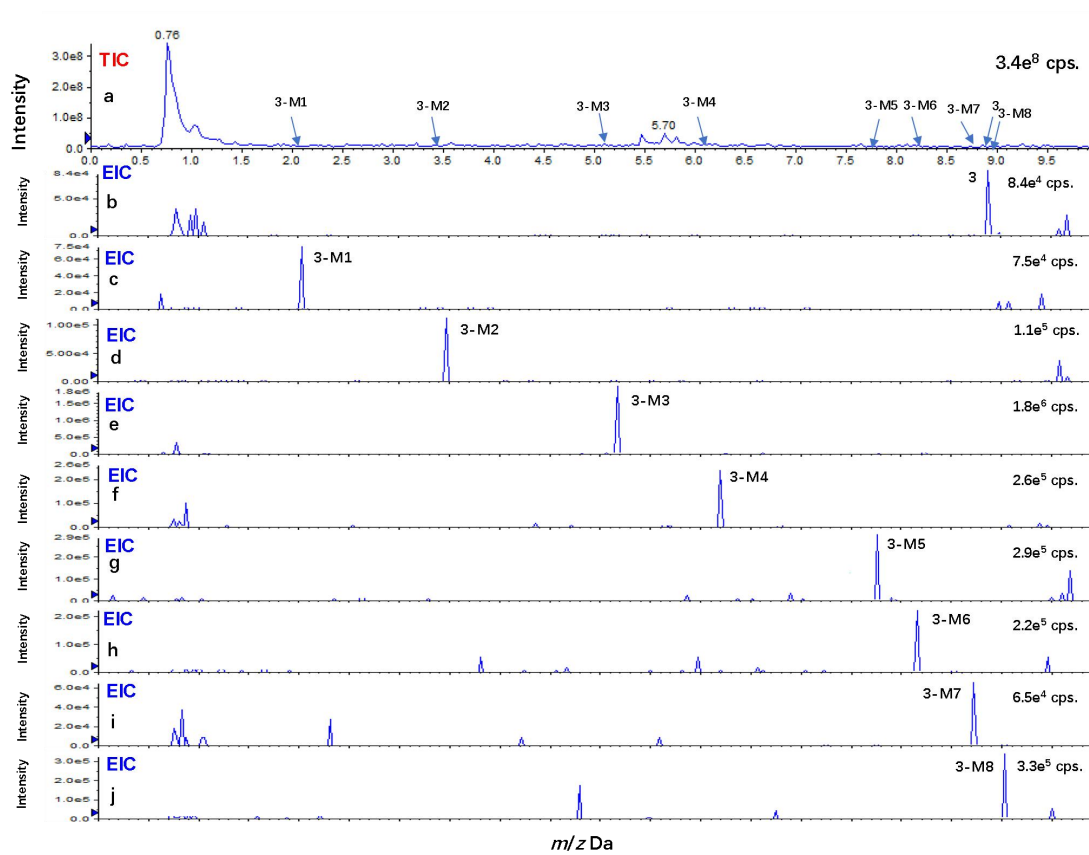

**Fig. S6.** Total ion chromatograms (a) and extracted ion chromatograms (b, c, d, e, f, g, h, i, j) of compound **3** and its metabolites in rat urine.

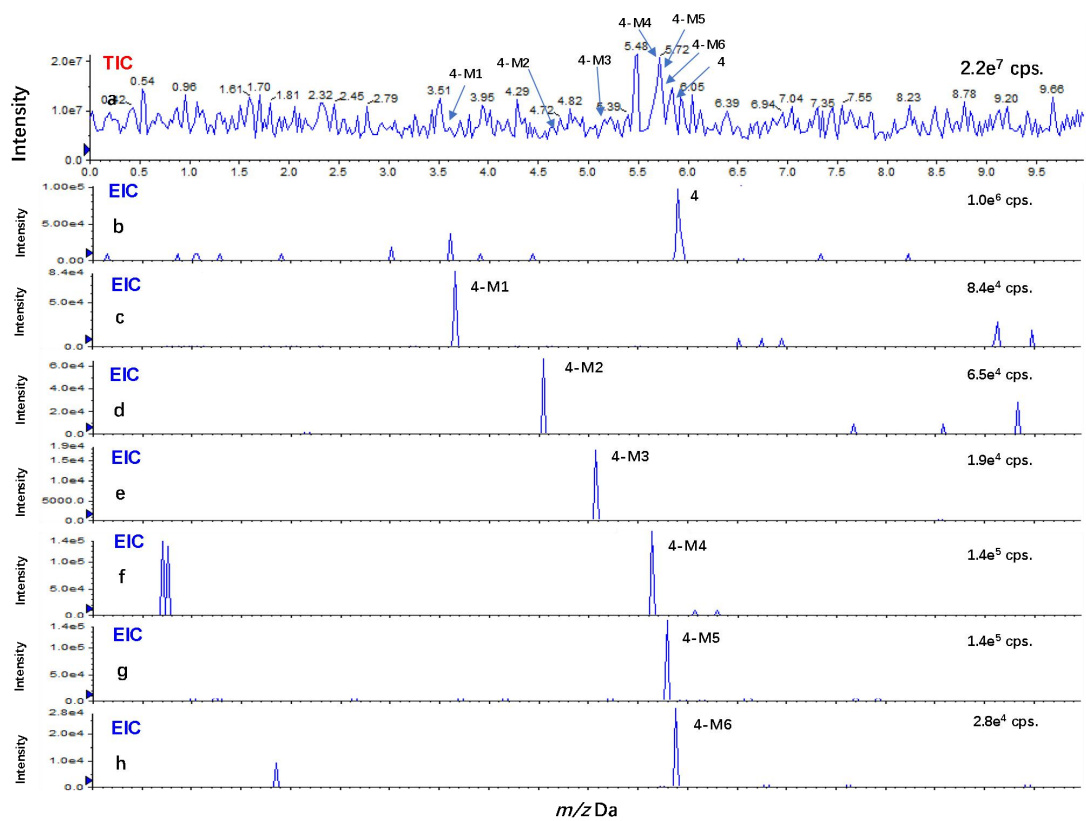

**Fig. S7.** Total ion chromatograms (a) and extracted ion chromatograms (b, c, d, e, f, g, h) of compound 4 and its metabolites in rat urine.

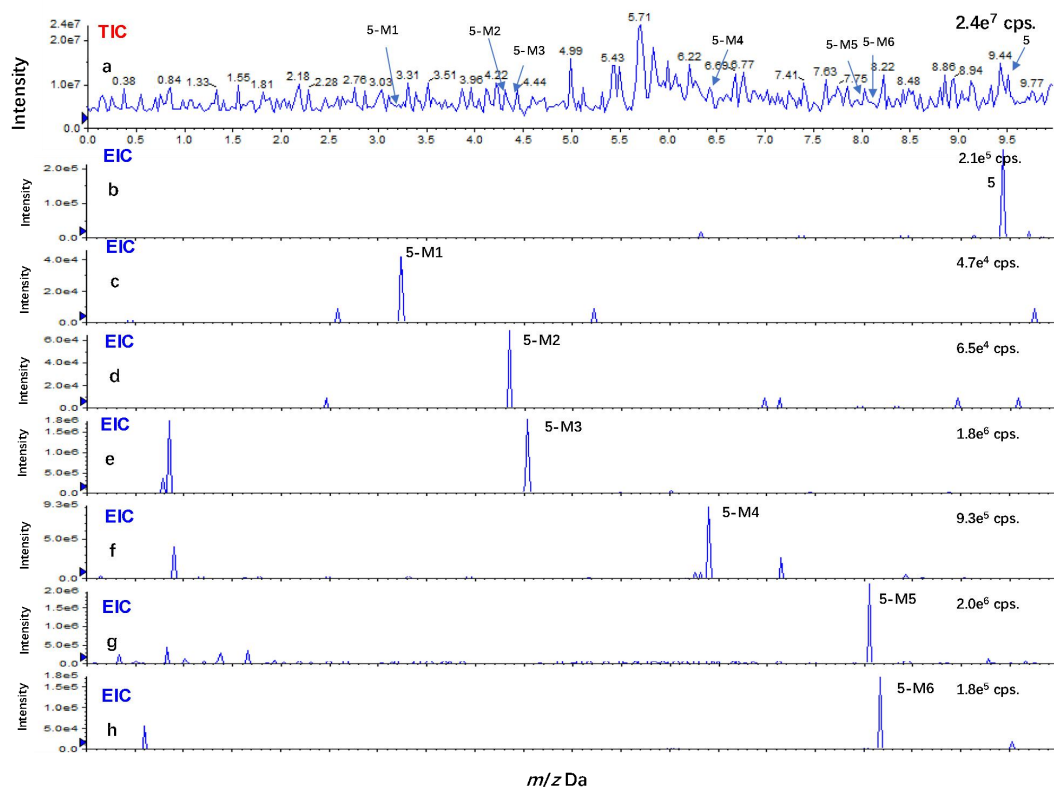

**Fig. S8.** Total ion chromatograms (a) and extracted ion chromatograms (b, c, d, e, f, g, h) of compound **5** and its metabolites in rat urine.

**Table S1.** The effects of **1-5** on cell activity of A549 (human lung adenocarcinoma cell).

| Group    | n | Cell availability (%) |               |               |
|----------|---|-----------------------|---------------|---------------|
|          |   | 24h                   | 48h           | 72h           |
| Control  | 9 | 100±17.80             | 100±6.93      | 100±7.28      |
| <b>1</b> | 9 | 88.82±7.81            | 73.61±5.93*** | 70.39±9.65*** |
| <b>2</b> | 9 | 90.91±8.76            | 78.13±11.78** | 90.00±16.00   |
| <b>3</b> | 9 | 88.91±6.24            | 85.44±10.93*  | 90.50±11.61   |
| <b>4</b> | 9 | 86.06±17.06           | 90.27±9.93*   | 94.65±9.90    |
| <b>5</b> | 9 | 87.26±7.94*           | 98.61±9.80    | 87.73±12.73*  |

**Table S2.** The effects of **1-5** on cell activity of HepG2 (human liver cancer cell).

| Group    | n | Cell availability (%) |                |                |
|----------|---|-----------------------|----------------|----------------|
|          |   | 24h                   | 48h            | 72h            |
| Control  | 9 | 100±7.99              | 100±7.82       | 100±5.15       |
| <b>1</b> | 9 | 153.56±42.55**        | 162.62±48.48** | 139.48±24.10** |
| <b>2</b> | 9 | 139.56±26.88**        | 164.83±38.21** | 139.85±39.56*  |
| <b>3</b> | 9 | 126.63±20.89**        | 125.33±23.30*  | 114.58±9.79**  |
| <b>4</b> | 9 | 116.55±10.34**        | 102.95±14.74   | 108.87±6.57*   |
| <b>5</b> | 9 | 118.04±21.15*         | 84.30±8.70**   | 101.95±5.67    |

**Table S3.** The effects of **1-5** on cell activity of HCT116 (Human colorectal cancer cells).

| Group   | n | Cell availability (%) |              |               |
|---------|---|-----------------------|--------------|---------------|
|         |   | 24h                   | 48h          | 72h           |
| Control | 6 | 100±10.24             | 100±14.80    | 100±3.34      |
| 1       | 6 | 106.94±23.84          | 91.26±16.12  | 60.63±4.64*** |
| 2       | 6 | 96.46±10.19           | 95.26±17.11  | 71.06±8.45*** |
| 3       | 6 | 87.74±12.40           | 104.84±6.73  | 80.48±6.58*** |
| 4       | 6 | 95.94±6.57            | 102.56±8.42  | 100.84±8.35   |
| 5       | 6 | 80.25±7.51*           | 85.13±14.86* | 47.04±5.07*** |

**Table S4.** The effects of **1-5** on cell activity of MCF7 (Human breast cancer cells).

| Group   | n | Cell availability (%) |               |               |
|---------|---|-----------------------|---------------|---------------|
|         |   | 24h                   | 48h           | 72h           |
| Control | 6 | 100±7.50              | 100±8.92      | 100±6.64      |
| 1       | 6 | 137.08±5.17**         | 96.21±17.34   | 50.85±9.15*** |
| 2       | 6 | 131.60±14.75**        | 98.17±13.74   | 105.30±13.11  |
| 3       | 6 | 147.71±26.95***       | 101.12±10.16  | 96.05±11.35   |
| 4       | 6 | 200.04±25.17***       | 99.52±6.19    | 96.73±6.10    |
| 5       | 6 | 46.58±8.14***         | 31.80±5.67*** | 13.50±2.78*** |
